# Supplementary material for: A Prospective Study of the Causes of Febrile Illness Requiring Hospitalization in Children in Cambodia
Source: PubMed Central journal article supplement (PMC3621876; doi:10.1371/journal.pone.0060634), 2013-04-09

**Figure S1.**

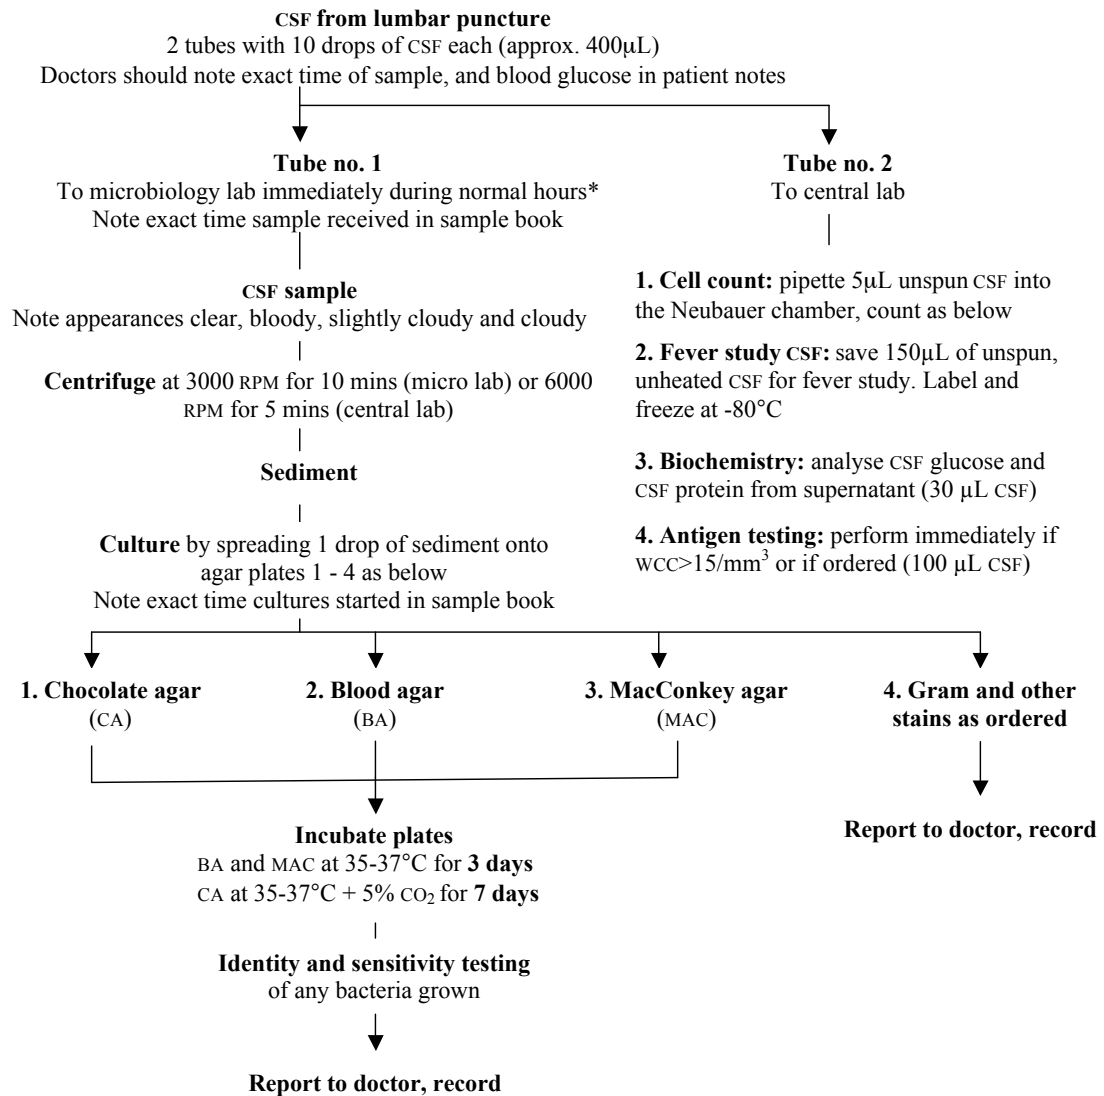

Supplement: pone.0060634.s001.pdf [file pone.0060634.s001.pdf]
