# Supplementary material for: A Prospective Study of the Causes of Febrile Illness Requiring Hospitalization in Children in Cambodia
Source: PubMed Central journal article supplement (PMC3621876; doi:10.1371/journal.pone.0060634), 2013-04-09
Supplement: pone.0060634.s004.pdf [file pone.0060634.s004.pdf]

1 **Table S1.**

2

|                                  | <b>Diagnosis</b>                            | <b>DENV NS1</b>       | <b>Paired sera<br/>DENV IgM</b> | <b>JEV IgM</b>                                                                              | <b>Single serum</b> |                       | <b>JEV/<br/>DENV<br/>ratio</b> |
|----------------------------------|---------------------------------------------|-----------------------|---------------------------------|---------------------------------------------------------------------------------------------|---------------------|-----------------------|--------------------------------|
|                                  |                                             |                       |                                 |                                                                                             | <b>DENV<br/>IgM</b> | <b>JEV<br/>IgM</b>    |                                |
| <b>DENV</b>                      | Acute DENV                                  | Positive              | Negative,<br>static, falling    | Rising <sup>a</sup> , falling <sup>b</sup> ,<br>static <sup>c</sup> , negative <sup>d</sup> |                     |                       | <1                             |
|                                  | Acute DENV                                  | Negative,<br>positive | Rising                          | Rising, falling,<br>static, negative                                                        |                     |                       | <1                             |
|                                  | Acute/recent<br>DENV                        | Negative              | Static                          | Static, negative                                                                            |                     |                       | <1                             |
|                                  | Acute/recent<br>indeterminate<br>flavivirus | Negative              | Falling                         | Static, negative                                                                            |                     |                       | <1                             |
|                                  | Acute/recent<br>indeterminate<br>flavivirus | Negative              | Rising                          | Negative, static,<br>falling                                                                |                     |                       | >1                             |
|                                  | Acute/recent<br>DENV                        |                       |                                 |                                                                                             |                     | Positive              | Positive,<br>negative          |
| <b>JEV</b>                       | Acute JEV                                   | Negative              | Negative,<br>static, falling    | Rising                                                                                      |                     |                       | >1                             |
|                                  | Acute/recent<br>JEV                         | Negative              | Negative,<br>static             | Static                                                                                      |                     |                       | >1                             |
|                                  | Acute/recent<br>indeterminate<br>flavivirus | Negative              | Negative,<br>static             | Falling                                                                                     |                     |                       | >1                             |
|                                  | Acute/recent<br>indeterminate<br>flavivirus | Negative              | Negative,<br>static, falling    | Rising                                                                                      |                     |                       | <1                             |
|                                  | Acute/recent<br>JEV                         |                       |                                 |                                                                                             |                     | Negative,<br>positive | Positive                       |
| <b>Mixed<br/>Dengue/<br/>JEV</b> | Acute/recent<br>indeterminate<br>flavivirus | Negative              | Falling                         | Falling                                                                                     |                     |                       | >1 or<br><1                    |
